# Supplementary material
Source: HighWire-hosted journal article supplement (https://bmjopen.bmj.com/content/6/9/e012555)
Supplement: inline-supplementary-material-6 [file inline-supplementary-material-6.pdf]

**Appendix 6 Quality assessment: AMSTAR score of included Systematic Reviews\* (n=60)**

| AMSTAR-item                      | 1: priori design provided | 2: duplicate study selection and extraction | 3: comprehensive literature search performed | 4: status publication (grey literature) used as inclusion criteria | 5: List of studies (included and excluded) provided | 6: characteristics of the included studies provided | 7: scientific quality of the included studies assessed and documented | 8: scientific quality of the included studies used appropriately in formulating conclusions | 9: methods used to combine the findings of studies were appropriate | 10: likelihood of publication bias was assessed | 11: conflict of interest was included | Total score** |
|----------------------------------|---------------------------|---------------------------------------------|----------------------------------------------|--------------------------------------------------------------------|-----------------------------------------------------|-----------------------------------------------------|-----------------------------------------------------------------------|---------------------------------------------------------------------------------------------|---------------------------------------------------------------------|-------------------------------------------------|---------------------------------------|---------------|
| Algie et al., 2015 (67)          | Yes                       | Yes                                         | Yes                                          | Yes                                                                | Yes                                                 | Yes                                                 | Yes                                                                   | Yes                                                                                         | Yes                                                                 | No                                              | No                                    | 9             |
| Bayoumi et al., 2014 (30)        | No                        | No                                          | No                                           | No                                                                 | No                                                  | Yes                                                 | Yes                                                                   | Yes                                                                                         | Yes                                                                 | No                                              | No                                    | 4             |
| Bergs et al., 2014 (66)          | No                        | Yes                                         | Yes                                          | Yes                                                                | No                                                  | No                                                  | Yes                                                                   | Yes                                                                                         | Yes                                                                 | No                                              | No                                    | 6             |
| Blot et al., 2014 (39)           | No                        | CA                                          | No                                           | Yes                                                                | No                                                  | No                                                  | Yes                                                                   | Yes                                                                                         | Yes                                                                 | Yes                                             | No                                    | 5             |
| Butler et al., 2011 (75)         | Yes                       | Yes                                         | Yes                                          | Yes                                                                | Yes                                                 | Yes                                                 | Yes                                                                   | Yes                                                                                         | Yes                                                                 | No                                              | No                                    | 9             |
| Cameron et al., 2012 (61)        | Yes                       | Yes                                         | Yes                                          | Yes                                                                | Yes                                                 | Yes                                                 | Yes                                                                   | Yes                                                                                         | Yes                                                                 | Yes                                             | No                                    | 10            |
| Chan et al., 2010 (69)           | No                        | Yes                                         | Yes                                          | Yes                                                                | No                                                  | Yes                                                 | Yes                                                                   | Yes                                                                                         | Yes                                                                 | Yes                                             | No                                    | 8             |
| Chen et al., 2013 (63)           | No                        | Yes                                         | Yes                                          | No                                                                 | No                                                  | Yes                                                 | Yes                                                                   | No                                                                                          | NA                                                                  | No                                              | No                                    | 4             |
| Christensen and Lundh, 2013 (26) | Yes                       | Yes                                         | Yes                                          | Yes                                                                | Yes                                                 | Yes                                                 | Yes                                                                   | Yes                                                                                         | Yes                                                                 | Yes                                             | No                                    | 10            |
| Cole et al., 1998 (45)           | No                        | No                                          | Yes                                          | Yes                                                                | No                                                  | Yes                                                 | Yes                                                                   | Yes                                                                                         | No                                                                  | No                                              | No                                    | 5             |
| Collinsworth et al., 2014 (49)   | No                        | No                                          | Yes                                          | No                                                                 | No                                                  | No                                                  | Yes                                                                   | Yes                                                                                         | Yes                                                                 | No                                              | No                                    | 4             |
| Conroy et al., 2005 (53)         | No                        | Yes                                         | Yes                                          | Yes                                                                | No                                                  | Yes                                                 | Yes                                                                   | Yes                                                                                         | Yes                                                                 | Yes                                             | No                                    | 8             |
| Coussement et al., 2008 (60)     | No                        | CA                                          | Yes                                          | Yes                                                                | No                                                  | Yes                                                 | Yes                                                                   | Yes                                                                                         | Yes                                                                 | No                                              | No                                    | 6             |
| Damiani et al., 2015 (41)        | No                        | Yes                                         | Yes                                          | Yes                                                                | No                                                  | Yes                                                 | Yes                                                                   | No                                                                                          | Yes                                                                 | Yes                                             | No                                    | 7             |
| Davey et al., 2013 (33)          | Yes                       | Yes                                         | Yes                                          | Yes                                                                | Yes                                                 | Yes                                                 | Yes                                                                   | Yes                                                                                         | Yes                                                                 | No                                              | No                                    | 9             |
| Durieux et al., 2008 (28)        | Yes                       | Yes                                         | Yes                                          | Yes                                                                | Yes                                                 | Yes                                                 | Yes                                                                   | Yes                                                                                         | Yes                                                                 | No                                              | No                                    | 9             |
| Ensing et al., 2015 (35)         | No                        | Yes                                         | Yes                                          | Yes                                                                | Yes                                                 | Yes                                                 | Yes                                                                   | Yes                                                                                         | NA                                                                  | No                                              | No                                    | 7             |
| Esmonde et al., 2006 (68)        | No                        | Yes                                         | Yes                                          | Yes                                                                | No                                                  | No                                                  | Yes                                                                   | Yes                                                                                         | NA                                                                  | No                                              | No                                    | 5             |
| Flodgren et al., 2011 (81)       | Yes                       | Yes                                         | Yes                                          | Yes                                                                | Yes                                                 | Yes                                                 | Yes                                                                   | Yes                                                                                         | Yes                                                                 | Yes                                             | No                                    | 10            |
| Flodgren et al., 2013 (37)       | Yes                       | Yes                                         | Yes                                          | Yes                                                                | Yes                                                 | Yes                                                 | Yes                                                                   | Yes                                                                                         | Yes                                                                 | Yes                                             | No                                    | 10            |
| Gillaizeau et al., 2013 (29)     | Yes                       | Yes                                         | Yes                                          | Yes                                                                | Yes                                                 | Yes                                                 | Yes                                                                   | Yes                                                                                         | Yes                                                                 | Yes                                             | No                                    | 10            |
| Gould et al., 2010 (43)          | Yes                       | Yes                                         | Yes                                          | Yes                                                                | Yes                                                 | Yes                                                 | Yes                                                                   | Yes                                                                                         | Yes                                                                 | No                                              | No                                    | 9             |
| Griffiths et al., 2005 (52)      | No                        | Yes                                         | Yes                                          | Yes                                                                | No                                                  | No                                                  | Yes                                                                   | Yes                                                                                         | Yes                                                                 | No                                              | No                                    | 6             |
| Hempel et al., 2015 (65)         | Yes                       | Yes                                         | Yes                                          | Yes                                                                | No                                                  | Yes                                                 | Yes                                                                   | Yes                                                                                         | No                                                                  | No                                              | No                                    | 7             |
| Hempenius et al., 2011 (47)      | No                        | Yes                                         | Yes                                          | Yes                                                                | No                                                  | Yes                                                 | Yes                                                                   | Yes                                                                                         | Yes                                                                 | Yes                                             | No                                    | 8             |
| Hohl et al., 2015 (27)           | Yes                       | Yes                                         | Yes                                          | Yes                                                                | No                                                  | Yes                                                 | Yes                                                                   | Yes                                                                                         | Yes                                                                 | No                                              | No                                    | 8             |
| Holland et al., 2008 (24)        | No                        | Yes                                         | Yes                                          | Yes                                                                | No                                                  | Yes                                                 | Yes                                                                   | Yes                                                                                         | Yes                                                                 | Yes                                             | No                                    | 8             |
| Howell et al., 2014 (64)         | Yes                       | No                                          | Yes                                          | Yes                                                                | No                                                  | Yes                                                 | Yes                                                                   | Yes                                                                                         | Yes                                                                 | No                                              | No                                    | 7             |
| Hshsieh et al., 2015 (50)        | No                        | No                                          | Yes                                          | Yes                                                                | No                                                  | Yes                                                 | Yes                                                                   | Yes                                                                                         | Yes                                                                 | No                                              | No                                    | 6             |
| Jansson et al., 2013 (38)        | No                        | Yes                                         | No                                           | No                                                                 | No                                                  | No                                                  | Yes                                                                   | Yes                                                                                         | NA                                                                  | No                                              | No                                    | 3             |
| Kaboli et al., 2006 (31)         | No                        | Yes                                         | Yes                                          | Yes                                                                | No                                                  | Yes                                                 | No                                                                    | No                                                                                          | Yes                                                                 | No                                              | No                                    | 5             |
| Kahn et al., 2013 (72)           | Yes                       | Yes                                         | Yes                                          | Yes                                                                | Yes                                                 | Yes                                                 | Yes                                                                   | Yes                                                                                         | Yes                                                                 | Yes                                             | No                                    | 10            |
| Lau and Haut., 2014 (73)         | No                        | No                                          | No                                           | Yes                                                                | No                                                  | Yes                                                 | Yes                                                                   | No                                                                                          | NA                                                                  | No                                              | No                                    | 3             |
| Lowthian et al., 2015 (57)       | Yes                       | Yes                                         | Yes                                          | Yes                                                                | No                                                  | Yes                                                 | Yes                                                                   | Yes                                                                                         | Yes                                                                 | No                                              | No                                    | 8             |
| Maaskant et al., 2015 (23)       | Yes                       | Yes                                         | Yes                                          | Yes                                                                | Yes                                                 | Yes                                                 | Yes                                                                   | Yes                                                                                         | Yes                                                                 | NA                                              | No                                    | 9             |
| Maharaj et al., 2015 (71)        | No                        | Yes                                         | Yes                                          | Yes                                                                | No                                                  | Yes                                                 | Yes                                                                   | Yes                                                                                         | Yes                                                                 | Yes                                             | No                                    | 8             |
| Manias et al., 2012 (32)         | No                        | Yes                                         | Yes                                          | Yes                                                                | No                                                  | Yes                                                 | Yes                                                                   | Yes                                                                                         | Yes                                                                 | No                                              | No                                    | 7             |

|                                   |     |     |     |     |     |     |     |     |     |     |    |    |
|-----------------------------------|-----|-----|-----|-----|-----|-----|-----|-----|-----|-----|----|----|
| Martinez et al., 2015 (51)        | Yes | Yes | Yes | Yes | No  | Yes | Yes | Yes | Yes | Yes | No | 9  |
| Massey et al., 2010 (70)          | No  | No  | Yes | Yes | No  | Yes | Yes | No  | NA  | No  | No | 4  |
| Medding et al., 2014 (40)         | No  | Yes | Yes | Yes | No  | Yes | No  | No  | Yes | No  | No | 5  |
| Miake-Lye et al., 2013 (62)       | No  | No  | Yes | No  | No  | Yes | Yes | Yes | NA  | No  | No | 4  |
| Milisen et al., 2005 (46)         | No  | Yes | Yes | Yes | Yes | Yes | Yes | No  | Yes | No  | No | 7  |
| Mueller et al., 2012 (25)         | No  | Yes | No  | Yes | No  | Yes | Yes | Yes | Yes | No  | No | 6  |
| Naylor et al., 2004 (78)          | No  | Yes | No  | Yes | No  | Yes | Yes | Yes | Yes | No  | No | 6  |
| Niven et al., 2014 (54)           | No  | Yes | Yes | Yes | No  | Yes | Yes | Yes | Yes | Yes | No | 8  |
| Oliver et al., 2007 (59)          | No  | Yes | Yes | Yes | Yes | Yes | Yes | Yes | Yes | No  | No | 8  |
| Pannick et al., 2015 (76)         | No  | Yes | Yes | Yes | No  | Yes | No  | No  | No  | No  | No | 4  |
| Patterson et al., 2014 (34)       | Yes | Yes | Yes | Yes | Yes | Yes | Yes | Yes | Yes | Yes | No | 10 |
| Reed et al., 2010 (74)            | No  | Yes | Yes | Yes | No  | Yes | Yes | Yes | Yes | Yes | No | 8  |
| Rennke et al., 2013 (55)          | No  | Yes | Yes | Yes | No  | Yes | Yes | Yes | Yes | No  | No | 7  |
| Reston et al., 2013 (48)          | No  | No  | No  | No  | No  | Yes | Yes | Yes | NA  | No  | No | 3  |
| Rotter et al., 2010 (79)          | Yes | Yes | Yes | Yes | Yes | Yes | Yes | Yes | Yes | Yes | No | 10 |
| Safdar and Abad, 2008 (44)        | No  | Yes | Yes | Yes | No  | Yes | Yes | Yes | Yes | No  | No | 7  |
| Sheppard et al., 2013 (56)        | Yes | Yes | Yes | Yes | Yes | Yes | Yes | Yes | Yes | No  | No | 9  |
| Silvestri et al., 2005 (42)       | No  | CA  | No  | Yes | No  | Yes | No  | No  | NA  | No  | No | 2  |
| Sullivan and Schoelles, 2013 (77) | No  | Yes | Yes | Yes | No  | Yes | Yes | Yes | NA  | No  | No | 6  |
| Wang et al., 2015 (36)            | No  | CA  | Yes | Yes | No  | Yes | Yes | Yes | Yes | Yes | No | 7  |
| Weaver et al., 2013 (80)          | No  | Yes | Yes | Yes | No  | Yes | Yes | No  | Yes | No  | No | 6  |
| Wolfstadt et al., 2008 (22)       | No  | No  | Yes | Yes | No  | Yes | Yes | Yes | NA  | No  | No | 5  |
| Zhu et al., 2015 (58)             | No  | Yes | Yes | Yes | No  | Yes | No  | No  | Yes | Yes | No | 6  |

\*alphabetical order

\*\*Yes = 1; No, Not applicable (NA), Can't Answer (CA) = 0
