# Supplementary material
Source: HighWire-hosted journal article supplement (https://bmjopen.bmj.com/content/6/9/e012555)

**Appendix 7 Methodological quality of 60 systematic reviews on patient safety interventions.**

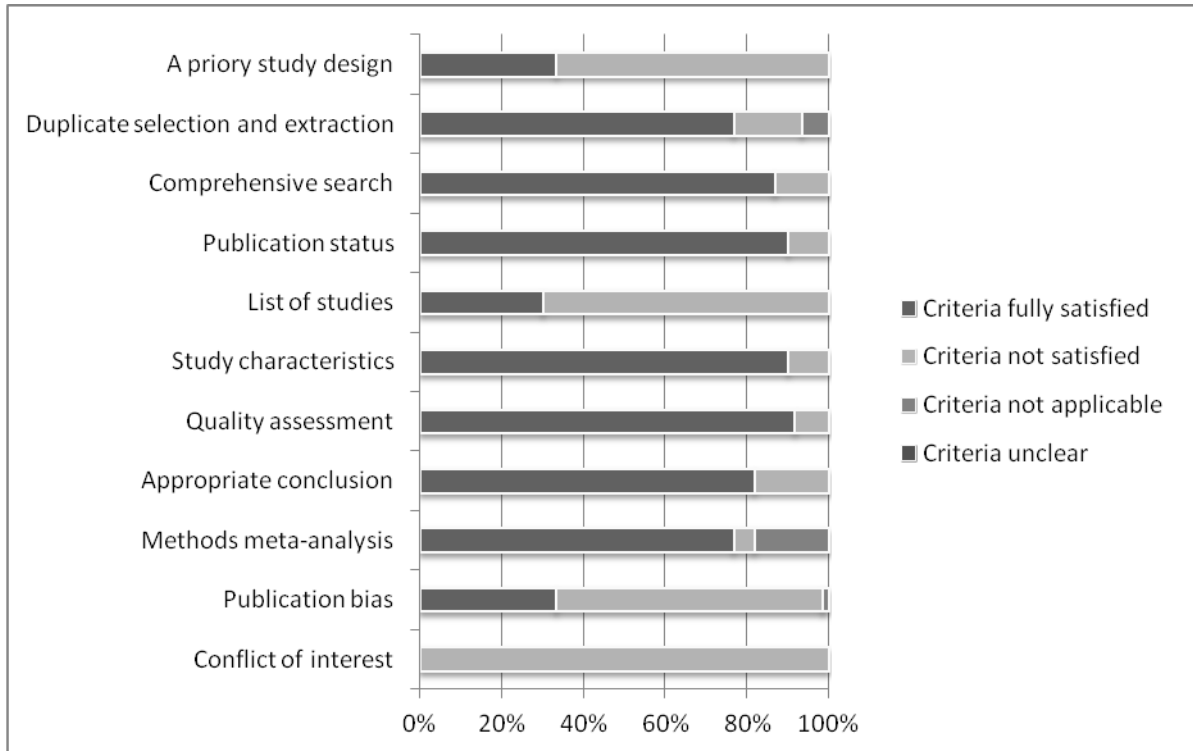

Supplement: inline-supplementary-material-7 [file inline-supplementary-material-7.pdf]
