# Supplementary material
Source: HighWire-hosted journal article supplement (https://bmjopen.bmj.com/content/6/9/e012555)
Supplement: inline-supplementary-material-8 [file inline-supplementary-material-8.pdf]

**Appendix 8 Characteristics of eligible studies included in the systematic reviews (n=60)**

| Patient-Safety Area                        | Study, year (reference)          | Time range  | No. of studies eligible studies (total included studies (n) ) | Intervention components eligible to patient safety                                                                                                                                                                                                                                                                                                                                                                                                                       | Studied in-hospital patients    | Total no. of participants | Study designs                                          |
|--------------------------------------------|----------------------------------|-------------|---------------------------------------------------------------|--------------------------------------------------------------------------------------------------------------------------------------------------------------------------------------------------------------------------------------------------------------------------------------------------------------------------------------------------------------------------------------------------------------------------------------------------------------------------|---------------------------------|---------------------------|--------------------------------------------------------|
| <b>Prevention of adverse drug events</b>   |                                  |             |                                                               |                                                                                                                                                                                                                                                                                                                                                                                                                                                                          |                                 |                           |                                                        |
| CPOE system                                | Wolfstadt et al., 2008 (22)      | Up to 2007  | 2 (10)                                                        | Computerized physician order entry system                                                                                                                                                                                                                                                                                                                                                                                                                                | Hospital and ICU patients       | U                         | CT = 1; ITS = 1                                        |
| CPOE system                                | Maaskant et al., 2015 (23)       | Up to 2014  | 2 (7)                                                         | Computerized physician order entry (CPOE)                                                                                                                                                                                                                                                                                                                                                                                                                                | ≥ 18 years                      | 36730                     | CBA = 1; ITS = 1                                       |
| Medication reconciliation                  | Holland et al., 2008 (24)        | Up to 2005  | 22 (32)                                                       | Medication review                                                                                                                                                                                                                                                                                                                                                                                                                                                        | ≥ 60 years                      | 13305                     | RCT = 22                                               |
| Medication reconciliation                  | Mueller et al., 2012 (25)        | Up to 2012  | 5 (26)                                                        | Medication reconciliation                                                                                                                                                                                                                                                                                                                                                                                                                                                | Not specified                   | 1819                      | RCT = 3; non- RCT = 1; CBA = 1                         |
| Medication reconciliation                  | Christensen and Lundh, 2013 (26) | Up to 2011  | 5 (5)                                                         | Medication review                                                                                                                                                                                                                                                                                                                                                                                                                                                        | Not specified                   | 1186                      | RCT = 5                                                |
| Medication reconciliation                  | Hohl et al., 2015 (27)           | 2000-2013   | 6 (7)                                                         | Medication review                                                                                                                                                                                                                                                                                                                                                                                                                                                        | ≥ 18 years in acute care        | 1970                      | RCT = 5; non-RCT = 1                                   |
| Computer assisted decision support/ alerts | Durieux et al., 2008 (28)        | 1966 - 2006 | 10 (23)                                                       | Computer-assisted decision support on drug dosage                                                                                                                                                                                                                                                                                                                                                                                                                        | Patients receiving drug therapy | 1210                      | RCT = 9; non- RCT = 1                                  |
| Computer assisted decision support/ alerts | Gillaizeau et al., 2013 (29)     | 1996 - 2013 | 33 (46)                                                       | Computerized advice on drug dosage as a recommendation provided to the healthcare professional                                                                                                                                                                                                                                                                                                                                                                           | Not specified                   | 30341                     | RCT = 33                                               |
| Computer assisted decision support/ alerts | Bayoumi et al., 2014 (30)        | 1974 - 2013 | 9 (36)                                                        | Computerized drug lab alerts for clinicians on prescribing or monitoring decisions                                                                                                                                                                                                                                                                                                                                                                                       | ≥ 18 years                      | N.R.                      | RCT = 9                                                |
| Multi component interventions              | Kaboli et al., 2006 (31)         | 1985 - 2005 | 13 (36)                                                       | Clinical pharmacy activities and responsibilities (patient interview, medication profile and medical record review, presentation of drug regimen, recommendations to care team or physician, participating on rounds with inpatient care team, drug monitoring and recommendation follow-up, drug therapy dosing or management, documentation of clinical interventions or recommendations, patient counseling before discharge and telephone follow-up after discharge) | ≥ 18 years                      | 12397                     | RCT = 7; non- RCT = 1; quasi experimental = 1; CBA = 4 |
| Multi component interventions              | Manias et al., 2012 (32)         | Up to 2011  | 10 (24)                                                       | Computerized physician order entry; changes in work schedules; intravenous systems; modes of education; medication reconciliation; pharmacist involvement; protocols and guidelines; support systems for clinical decision-making                                                                                                                                                                                                                                        | ICU                             | U                         | non- RCT = 2; quasi RCT = 1; CBA = 7                   |

| Patient-Safety Area                                          | Study, year (reference)     | Time range  | No. of studies eligible studies (total included studies (n) ) | Intervention components eligible to patient safety                                                                                                                                                                                                                                                                                                                                                                                                                                                                                                                                                      | Studied in-hospital patients   | Total no. of participants | Study designs                       |
|--------------------------------------------------------------|-----------------------------|-------------|---------------------------------------------------------------|---------------------------------------------------------------------------------------------------------------------------------------------------------------------------------------------------------------------------------------------------------------------------------------------------------------------------------------------------------------------------------------------------------------------------------------------------------------------------------------------------------------------------------------------------------------------------------------------------------|--------------------------------|---------------------------|-------------------------------------|
| Multi component interventions                                | Davey et al., 2013 (33)     | 1980 - 2009 | 23 (89)                                                       | Persuasive interventions (e.g. distribution of educational materials, local consensus processes, educational outreach visits and local opinion leaders); restrictive interventions (e.g. selective reporting of laboratory susceptibilities, formulary restriction and requiring prior authorization of prescriptions by infectious diseases physicians, microbiologists, pharmacists etc); structural interventions (e.g. changing from paper to computerized records, rapid laboratory testing and computerized decision support systems)                                                             | Acute care                     | U                         | RCT = 13; CCT = 2; CBA = 3; ITS = 5 |
| Multi component interventions                                | Patterson et al., 2014 (34) | Up to 2009  | 3 (10)                                                        | Professional interventions (e.g. educational programs aimed at prescribers); organizational interventions (e.g. skill-mix changes, pharmacist-led medication review services or specialist clinics); information and communication technology (ICT) interventions (e.g. clinical decision support systems or use of risk screening tools); financial interventions (e.g. incentive schemes for changes in prescribing practice); regulatory interventions (e.g. government policy or legislative changes affecting prescribing)                                                                         | ≥ 65 years                     | 1152                      | RCT = 3                             |
| Multi component interventions                                | Ensing et al., 2015 (35)    | Up to 2014  | 19 (30)                                                       | Pharmacist interventions (e.g. different categories: admission, patient counseling, medical team, medication review, discharge reconciliation and provision of adherence aids)                                                                                                                                                                                                                                                                                                                                                                                                                          | ≥ 18 years                     | 7829                      | RCT = 19                            |
| Multi component interventions                                | Wang et al., 2015 (36)      | Up to 2014  | 2 (4)                                                         | Pharmacist interventions (e.g. physician rounds, providing physicians with information and advice on ADE, drug interactions and dose intervals)                                                                                                                                                                                                                                                                                                                                                                                                                                                         | (Pediatric) ICU                | 2794                      | CBA = 2                             |
| <b>Infection prevention</b>                                  |                             |             |                                                               |                                                                                                                                                                                                                                                                                                                                                                                                                                                                                                                                                                                                         |                                |                           |                                     |
| Prevention of device-related infections (CAUTI; CLABSI; VAP) | Flodgren et al., 2013 (37)  | Up to 2012  | 10 (13)                                                       | Interventions to avoid the use, or decrease the length of use of invasive medical devices (i.e. urinary catheters, central line catheters, mechanical ventilators), or interventions to improve adoption of measures to prevent device-related infection, such as: professional interventions (distribution of educational materials, educational meetings, local consensus processes, local opinion leaders, audit and feedback and reminders); organizational interventions (revision of professional roles and clinical multidisciplinary teams); financial interventions; regulatory interventions. | Patients with invasive devices | U                         | ITS = 10                            |
| Prevention of device-related infections (CAUTI;              | Jansson et al., 2013 (38)   | 2003 – 2012 | 2 (8)                                                         | Education: continuing education, ongoing education, clinical education, inter-professional education.                                                                                                                                                                                                                                                                                                                                                                                                                                                                                                   | Critically ill patients ICU    | N.R.                      | Quasi experimental = 2              |

| Patient-Safety Area                                                | Study, year (reference)     | Time range  | No. of studies eligible studies (total included studies (n) ) | Intervention components eligible to patient safety                                                                                                                                                                                                                                                     | Studied in-hospital patients                                   | Total no. of participants | Study designs                   |
|--------------------------------------------------------------------|-----------------------------|-------------|---------------------------------------------------------------|--------------------------------------------------------------------------------------------------------------------------------------------------------------------------------------------------------------------------------------------------------------------------------------------------------|----------------------------------------------------------------|---------------------------|---------------------------------|
| CLABSI; VAP)                                                       |                             |             |                                                               |                                                                                                                                                                                                                                                                                                        |                                                                |                           |                                 |
| Prevention of device-related infections (CAUTI; CLABSI; VAP)       | Blot et al., 2014 (39)      | 1995 – 2012 | 8 (43)                                                        | Education; training; feedback; clinical reminders; bundle; checklist; empowerment to stop procedure; surveillance; leader designation; prepackaging of CVS materials; infrastructure changes; organizational changes                                                                                   | Patients with central line catheters on the ICU                | N.R.                      | CBA = 1; ITS = 7                |
| Prevention of device-related infections (CAUTI; CLABSI; VAP)       | Meddings et al., 2014 (40)  | 2008 – 2012 | 3 (30)                                                        | Education on improving appropriate use in catheter placement and behavior (e.g. catheter restriction and removal protocols); use of specific technologies                                                                                                                                              | Patients with a urinary catheter                               | U                         | RCT = 1; non- RCT = 1; CBA =1   |
| Interventions to improve compliance to sepsis bundle interventions | Damiani et al., 2015 (41)   | 2004-2014   | 5 (50)                                                        | Improving compliance to sepsis bundle interventions, consisting of educational programs (e.g. lectures and training sessions) and decision support tools ( e.g. screening tools, checklist or introduction of dedicated staff (e.g. sepsis teams).                                                     | ≥ 18 years with (severe) sepsis or septic shock                | 42295                     | ITS = 5                         |
| Interventions to improve hand hygiene compliance                   | Silvestri et al., 2005 (42) | 1976 – 2003 | 7 (9)                                                         | Hand washing                                                                                                                                                                                                                                                                                           | ICU                                                            | N.R.                      | RCT = 2; non- RCT = 5           |
| Interventions to improve hand hygiene compliance                   | Gould et al., 2010 (43)     | Up to 2009  | 1 (4)                                                         | Education; audit with performance feedback; health promotion; and variations in availability and type of products used for hand hygiene.                                                                                                                                                               | Not specified                                                  | N.R.                      | ITS = 1                         |
| Overall hospital acquired infection prevention                     | Safdar and Abad, 2008 (44)  | Up to 2006  | 25 (26)                                                       | Educational interventions for prevention of healthcare associated infections (lectures or classes, video presentations, posters, questionnaires and fact sheets, practical demonstrations, standardized self-study module, direct feedback and protocols to remove catheters when no longer necessary) | ICU and long-term care                                         | N.R.                      | RCT = 1; non- RCT = 1; CBA = 23 |
| <b>Delirium prevention</b>                                         |                             |             |                                                               |                                                                                                                                                                                                                                                                                                        |                                                                |                           |                                 |
| Delirium prevention                                                | Cole et al., 1998 (45)      | Up to 1998  | 8 (10)                                                        | Psychiatric assessment; education of patient and spouse; special (medical, surgical, nursing) care                                                                                                                                                                                                     | Cardiac, elderly orthopedic, elderly surgical, elderly medical | N.R.                      | RCT = 2; non-RCT = 6            |
| Delirium prevention                                                | Milisen et al., 2005 (46)   | Up to 2003  | 7 (7)                                                         | Psychiatric assessment; staff education; daily visits by a liaison nurse; screening for early detection of delirium                                                                                                                                                                                    | ≥ 60 years                                                     | 1683                      | RCT = 3; non-RCT = 3; CBA = 1   |
| Delirium                                                           | Hempenius et al.,           | 1979 – 2009 | 7 (16)                                                        | Non pharmacological interventions to prevention delirium                                                                                                                                                                                                                                               | ≥ 18 years                                                     | 1626                      | RCT = 1; Non RCT =              |

| Patient-Safety Area                                                              | Study, year (reference)        | Time range  | No. of studies eligible studies (total included studies (n) ) | Intervention components eligible to patient safety                                                                                                                                                                                                                                                                                                                                                                                                                                                                                                                                                                          | Studied in-hospital patients                                                             | Total no. of participants | Study designs                   |
|----------------------------------------------------------------------------------|--------------------------------|-------------|---------------------------------------------------------------|-----------------------------------------------------------------------------------------------------------------------------------------------------------------------------------------------------------------------------------------------------------------------------------------------------------------------------------------------------------------------------------------------------------------------------------------------------------------------------------------------------------------------------------------------------------------------------------------------------------------------------|------------------------------------------------------------------------------------------|---------------------------|---------------------------------|
| prevention                                                                       | 2011 (47)                      |             |                                                               | (interdisciplinary team; proactive geriatric consultation; education nursing staff; systematic cognitive screening; scheduled pain protocol; supportive psychotherapy)                                                                                                                                                                                                                                                                                                                                                                                                                                                      | (geriatric wards; general medicine service; hip surgery; coronary artery bypass surgery) |                           | 3; CBA = 3                      |
| Delirium prevention                                                              | Reston et al., 2013 (48)       | 1999 – 2012 | 17 (19)                                                       | Anesthesia protocols; medication review; pain management; staff education                                                                                                                                                                                                                                                                                                                                                                                                                                                                                                                                                   | Elderly                                                                                  | U                         | RCT = 4; non- RCT = 2; CBA = 11 |
| Delirium prevention                                                              | Collinsworth et al., 2014 (49) | 1988 – 2014 | 8 (14)                                                        | Daily assessment; monitoring; mediating strategies                                                                                                                                                                                                                                                                                                                                                                                                                                                                                                                                                                          | ICU                                                                                      | 2846                      | RCT = 3; CCT = 5                |
| Delirium prevention                                                              | Hshieh et al., 2015 (50)       | 1999-2013   | 8 (14)                                                        | Multi component non pharmacological delirium interventions (early mobility; cognition and orientation; sleep-wake- cycle preservation; hydration; hearing; vision)                                                                                                                                                                                                                                                                                                                                                                                                                                                          | ≥ 65 years                                                                               | 3113                      | RCT = 4; non-RCT = 4            |
| Delirium prevention                                                              | Martinez et al., 2015 (51)     | Up to 2012  | 7 (7)                                                         | Multi component interventions (e.g. physiotherapy, daily reorientation, family involvement in care, stimulation programmes with avoidance of sensorial deprivation and staff/family member education)                                                                                                                                                                                                                                                                                                                                                                                                                       | ≥ 60 years                                                                               | 1691                      | RCT = 7                         |
| <b>Prevention of adverse event after clinical handover or hospital discharge</b> |                                |             |                                                               |                                                                                                                                                                                                                                                                                                                                                                                                                                                                                                                                                                                                                             |                                                                                          |                           |                                 |
| Handover of inpatients                                                           | Griffiths et al., 2005 (52)    | Up to 2003  | 8 (9)                                                         | Post acute intermediate care                                                                                                                                                                                                                                                                                                                                                                                                                                                                                                                                                                                                | Post acute and ≥ 18 years                                                                | N.R.                      | RCT = 7; quasi RCT = 1          |
| Handover of inpatients                                                           | Conroy et al., 2011 (53)       | Up to 2009  | 5 (5)                                                         | Geriatric assessment for frail older people being rapidly discharged from acute hospital                                                                                                                                                                                                                                                                                                                                                                                                                                                                                                                                    | ≥ 65 years being rapidly discharged (<72 h) from a acute hospital setting                | 2287                      | RCT = 5                         |
| Handover of inpatients                                                           | Niven et al., 2014 (54)        | Up to 2012  | 5 (9)                                                         | Critical care transition programs                                                                                                                                                                                                                                                                                                                                                                                                                                                                                                                                                                                           | ICU                                                                                      | 16433                     | CBA = 5                         |
| Hospital discharge                                                               | Rennke et al., 2013 (55)       | 1990 – 2012 | 7 (47)                                                        | Intervention to improve transitional care at hospital discharge: pre discharge interventions (assessment of risk for adverse events, patient engagement, creation of individualized patient record, facilitation of communication with outpatient providers, multidisciplinary discharge planning team, dedicated transition provider and medication reconciliation); Postdischarge interventions (Outreach to patients, facilitation of clinical follow-up and medication reconciliation after discharge); Bridging interventions (inclusion of at least 1 pre-discharge component and at least 1 postdischarge component) | ≥ 18 years                                                                               | 1943                      | RCT = 6; non- RCT = 1           |
| Hospital                                                                         | Sheppard et al.,               | Up to 2012  | 7 (24)                                                        | Discharge planning from hospital to home                                                                                                                                                                                                                                                                                                                                                                                                                                                                                                                                                                                    | Elderly medical                                                                          | U                         | RCT = 7                         |

| Patient-Safety Area                               | Study, year (reference)      | Time range  | No. of studies eligible studies (total included studies (n) ) | Intervention components eligible to patient safety                                                                                                                                                                                                                         | Studied in-hospital patients                                                   | Total no. of participants | Study designs                  |
|---------------------------------------------------|------------------------------|-------------|---------------------------------------------------------------|----------------------------------------------------------------------------------------------------------------------------------------------------------------------------------------------------------------------------------------------------------------------------|--------------------------------------------------------------------------------|---------------------------|--------------------------------|
| discharge                                         | 2013 (56)                    |             |                                                               |                                                                                                                                                                                                                                                                            | patients, patients recovering from surgery and those with a mix of conditions  |                           |                                |
| Hospital discharge                                | Lowthian et al., 2015 (57)   | Up to 2013  | 3 (9)                                                         | Comprehensive geriatric nurse assessment; community based service transfer; identifying high risk patients;                                                                                                                                                                | ≥ 65 years, ED                                                                 | 2668                      | RCT = 3                        |
| Hospital discharge                                | Zhu et al., 2015 (58)        | Up to 2014  | 5 (10)                                                        | Nurse-led early discharge planning programmes (e.g. initial nurse visit within 48 hours of hospital admission; pre-discharge assessment; structured home visits; telephone follow-ups after discharge)                                                                     | Older adults                                                                   | 2503                      | RCT = 5                        |
| <b>Fall prevention</b>                            |                              |             |                                                               |                                                                                                                                                                                                                                                                            |                                                                                |                           |                                |
| Fall prevention                                   | Oliver et al., 2007 (59)     | Up to 2005  | 12 (43)                                                       | Risk assessment; care planning; medical/diagnostic approaches; changes in the physical environment; education; medication review; hip protectors; removal of physical restraints                                                                                           |                                                                                | N.R.                      | RCT = 5; CBA = 7               |
| Fall prevention                                   | Coussement et al., 2008 (60) | Up to 2006  | 8 (8)                                                         | Unifactorial interventions (vitamin D supplement; identification bracelet; bed alarm system; flooring types) and multifactorial interventions (exercise program; medication review; multidisciplinary teams and meetings; staff awareness; improving patient activities)   | ≥ 69 years, long stay geriatric care units and geriatric rehabilitation units. | 3894                      | RCT = 6; CT = 2                |
| Fall prevention                                   | Cameron et al., 2012 (61)    | Up to 2012  | 15 (60)                                                       | Management of urinary incontinence; fluid or nutritional therapy; environment/ assistive technology (e.g., carpeted floors); social environment; patient education; staff education                                                                                        | ≥ 65 years (or mean age > 65 years)                                            | 26887                     | RCT = 15                       |
| Fall prevention                                   | Miake-Lye et al., 2013 (62)  | 2005 - 2012 | 21 (21)                                                       | Patient education; bedside risk sign; staff education; fall alert wristband; footwear; review after fall; toileting schedules; medication review; environment modification; movement alarms; bedrail review; hip protectors; urine screening; vest/ belt or cuff restraint | General population or older adults                                             | U                         | RCT = 7; non- RCT = 14         |
| <b>Prevention of surgical adverse event</b>       |                              |             |                                                               |                                                                                                                                                                                                                                                                            |                                                                                |                           |                                |
| Preventing surgical site infections               | Chen et al., 2013 (63)       | Up to 2012  | 4 (19)                                                        | Screening and decolonization of surgical site infections                                                                                                                                                                                                                   | Orthopedic and trauma                                                          | 7845                      | RCT = 2; Systematic review = 2 |
| Interventions to reduce adverse events in surgery | Howell et al., 2014 (64)     | Up to 2012  | 7 (91)                                                        | Interventions to reduce adverse events in surgery: staffing factors; subspecialisation; benchmarking; mixed process interventions ; checklist interventions; technology or training; colorectal pathways; care pathways                                                    | Surgical patients                                                              | 88423                     | RCT = 7                        |

| Patient-Safety Area                                                                            | Study, year (reference)   | Time range   | No. of studies eligible studies (total included studies (n) ) | Intervention components eligible to patient safety                                                                                                         | Studied in-hospital patients                                                                                             | Total no. of participants | Study designs                          |
|------------------------------------------------------------------------------------------------|---------------------------|--------------|---------------------------------------------------------------|------------------------------------------------------------------------------------------------------------------------------------------------------------|--------------------------------------------------------------------------------------------------------------------------|---------------------------|----------------------------------------|
| Preventing wrong site surgery                                                                  | Hempel et al., 2015 (65)  | 2004-2014    | 4 (138)                                                       | Universal protocol; team training and education; retained surgical items                                                                                   | Surgical patients                                                                                                        | U                         | RCT = 1; ITS = 3                       |
| Surgical safety checklist                                                                      | Bergs et al., 2014 (66)   | Up to 2013   | 5 (7)                                                         | WHO surgical safety checklist                                                                                                                              | ≥ 18 years, non cardiac surgery; trauma and orthopaedic surgery; elective general surgery; high risk surgical procedures | U                         | ITS = 5                                |
| Surgical safety checklist                                                                      | Algie et al., 2015 (67)   | 2011-2014    | 1 (2)                                                         | Preventing wrong site surgery with safety checklist                                                                                                        | Surgical patients                                                                                                        | 22749                     | ITS = 1                                |
| <b>Prevention of hospital mortality and cardiopulmonary arrest with rapid response systems</b> |                           |              |                                                               |                                                                                                                                                            |                                                                                                                          |                           |                                        |
| Critical care outreach service                                                                 | Esmonde et al., 2006 (68) | 1996-2004    | 7 (23)                                                        | Critical care outreach service                                                                                                                             | Critically ill patients                                                                                                  | N.R.                      | RCT = 2; quasi experiment = 3; CBA = 2 |
| Rapid response teams                                                                           | Chan et al., 2010 (69)    | Up to 2008   | 16 (17)                                                       | Rapid response teams                                                                                                                                       | Adults and children                                                                                                      | N.R.                      | Non-RCT = 2; CBA = 12; ITS 2           |
| Rapid response systems                                                                         | Massey et al., 2010 (70)  | 1995 - 2009  | 5 (16)                                                        | Rapid response systems                                                                                                                                     | Critically ill patients                                                                                                  | U                         | RCT = 2; non- RCT = 2; CBA = 1         |
| Rapid response systems                                                                         | Maharaj et al., 2015 (71) | 1990 - 2013  | 5 (29)                                                        | Rapid response teams                                                                                                                                       | Pediatric and adult patients                                                                                             | 225686                    | RCT = 2; CBA = 1; ITS = 2              |
| <b>Prevention of venous thromboembolism</b>                                                    |                           |              |                                                               |                                                                                                                                                            |                                                                                                                          |                           |                                        |
| Prevention of venous thromboembolism                                                           | Kahn et al, 2013 (72)     | Up to 2010   | 17 (55)                                                       | Alerts, education and multifaceted interventions for the implementation of appropriate administration of thromboprophylaxis                                | ≥ 18 years, medical or surgical, at risk for venous thromboembolism (VTE)                                                | 79021                     | RCT = 1; quasi RCT = 1; non- RCT = 15  |
| Prevention of venous thromboembolism                                                           | Lau and Haut 2014 (73)    | 2001 to 2012 | 8 (16)                                                        | Education; paper based tools; computerized tools; real time audit and feedback or combinations of interventions to improve prescription of VTE prophylaxis | Unknown                                                                                                                  | U                         | RCT = 2; CBA = 6                       |
| <b>Prevention of adverse events by changes in staffing</b>                                     |                           |              |                                                               |                                                                                                                                                            |                                                                                                                          |                           |                                        |
| Staffing                                                                                       | Reed et al., 2010 (74)    | 1989 to 2010 | 2 (64)                                                        | Shift length; protected sleep time; night float; education among residents                                                                                 | Patients and residents                                                                                                   | 1294                      | RCT = 1; non- RCT = 1                  |

| Patient-Safety Area                                                   | Study, year (reference)           | Time range  | No. of studies eligible studies (total included studies (n) ) | Intervention components eligible to patient safety                                                                                                                                                                     | Studied in-hospital patients                                                                                                                | Total no. of participants | Study designs                  |
|-----------------------------------------------------------------------|-----------------------------------|-------------|---------------------------------------------------------------|------------------------------------------------------------------------------------------------------------------------------------------------------------------------------------------------------------------------|---------------------------------------------------------------------------------------------------------------------------------------------|---------------------------|--------------------------------|
| Staffing                                                              | Butler et al., 2011 (75)          | Up to 2009  | 2 (15)                                                        | Nursing staff models                                                                                                                                                                                                   | Not specified                                                                                                                               | 938                       | RCT = 2                        |
| Staffing                                                              | Pannick et al., 2015 (76)         | 1998-2013   | 20 (30)                                                       | Interdisciplinary team care interventions                                                                                                                                                                              | Geriatrics, infectious disease, pharmacotherapy and stroke                                                                                  | 30969                     | RCT = 14; non-RCT = 5; CBA = 1 |
| <b>Prevention of pressure ulcers</b>                                  |                                   |             |                                                               |                                                                                                                                                                                                                        |                                                                                                                                             |                           |                                |
|                                                                       | Sullivan and Schoelles, 2013 (77) | 2000 - 2012 | 15 (26)                                                       | Interventions for preventing pressure ulcers                                                                                                                                                                           | All inpatient units, including, surgical, ICU, critical care, acute care, rehabilitation, intermediate care medical care, oncology patients | N.R.                      | ITS = 15                       |
| <b>Prevention of mechanical complications and underfeeding</b>        |                                   |             |                                                               |                                                                                                                                                                                                                        |                                                                                                                                             |                           |                                |
|                                                                       | Naylor et al., 2004 (78)          | Up to 2011  | 8 (11)                                                        | Total parenteral nutrition team                                                                                                                                                                                        | ≥ 18 years                                                                                                                                  | U                         | non- RCT = 8                   |
| <b>Prevention of complications and mortality by clinical pathways</b> |                                   |             |                                                               |                                                                                                                                                                                                                        |                                                                                                                                             |                           |                                |
|                                                                       | Rotter et al., 2010 (79)          | Up to 2008  | 10 (27)                                                       | Clinical pathways (CPW)                                                                                                                                                                                                | Patients with conditions managed on a CPW                                                                                                   | 2632                      | RCT = 9, quasi RCT = 1         |
| <b>Prevention of adverse events by promoting a culture of safety</b>  |                                   |             |                                                               |                                                                                                                                                                                                                        |                                                                                                                                             |                           |                                |
|                                                                       | Weaver et al., 2013 (80)          | 2000 –2012  | 1 (33)                                                        | Intervention to promote a culture of patient safety (error prevention training coaching; family engagement; restructured patient safety governance; lessons learned program; cause analysis program; executive rounds) | ≤ 18 years                                                                                                                                  | 3752                      | ITS = 1                        |
| <b>Prevention of adverse events by external inspection</b>            |                                   |             |                                                               |                                                                                                                                                                                                                        |                                                                                                                                             |                           |                                |
|                                                                       | Flodgren et al., 2011 (81)        | Up to 2011  | 1 (2)                                                         | External inspections of compliance with standards                                                                                                                                                                      | Not reported                                                                                                                                | U                         | ITS = 1                        |

CAUTI = catheter associated urinary tract infection; CBA= controlled before after; C(C)T= controlled (clinical) trial; CLABSI = central line associated blood stream infections; IC = intensive care; ICU = intensive care unit; inc = inception of database (start); ITS = Interrupted time series; NR= not reported; RCT = randomized controlled trial; U = unclear; VAP = ventilator-associated pneumonia
