# Supplementary material
Source: HighWire-hosted journal article supplement (https://bmjopen.bmj.com/content/6/9/e012555)
Supplement: inline-supplementary-material-9 [file inline-supplementary-material-9.pdf]

Sellors 2001 Zermansky 2001 Stowasser 2002 Naunton 2003 Sellors 2003 Taylor 2003 Bolas 2004 Lim 2004 Sorensen 2004 Lenaghan 2004 Holland 2005

Vadher 1997 pop 1 Vadher 1997 pop 2 Ageno 2000 Fitzmaurice 2000 Mihajlovic 2003 Mitra 2005 Claes 2005 Plank 2006 Hovorka 2007 Kremen 2007 Le Meur 2007 Anderson 2007 Poller 2008 Pachler 2008 Saager 2008 Poller 2009 Blaha 2009 Cordingley 2007 Mihajlovic 2007 Asberg 2010 Wexler 2010 Sato 2011

Tschol 2003 Schnipper 2006

Dean 2001 Fine 2003 Carlin 2003 Khan 2003 Chu 2003 Bouza 2004 Micek 2004 Christ crain 2004 Bruins 2005 Paul 2006 Dean 2006 Christ Crain 2006

Triller 2007 Gillespie 2009 Schnipper 2009 Lisby 2010 Barker 2012 Kripalani 2011 Englander 2011 Farris 2014

Rosenthal 2003 Warren 2003 Babcock 2004 Berenholtz 2004 Coopersmith 2004 Rosenthal 2004 Salahuddin 2004 Warren 2004 Lobo 2005 topas 2005 Danchaiwijitr Rosenthal 2004 Pronovost 2004 Warren 2006

Black 2011 Chen 2011 Rubin 2011 Colombo 2012 Deschodt 2012 Martinez 2012

Fonda 2006

Haines 2010 Wald 2011 van Gaal 2011 Ang 2011  
Schwendimann 2006 Williams 2007 von Renteln- Kruse 2007 Stenvall 2007 Cumming 2008 Krauss 2008 Barker 2009 Koh 2009 Dykes 2010 Ang 2011

Sharek 2007 Zenker 2007 Chan 2008 Tibballs 2008 Baxter 2008 Hunt 2008

Bullock 2008 Piazza 2009 Streubel 2009 Boddi 2009 Fiumara 2010 Maynard 2010

Camins 2009 Manuel 2010 Lisby 2010 Schillig 2011 Korbkitjaroen 2011 Wald 2011 O'Leary 2011 Thanarasjasir lesprit 2013

Walsh 2009 Ackerman 2011 Delmore 2011 Kelleher 2012
